# Supplementary material for: Two 1D homochiral heterometallic chains: crystal structures, spectra, ferroelectricity and ferromagnetic properties
Source: Royal Society of Chemistry journal article supplement (doi:10.1039/d0ra00732c), 2020-01-01
Supplement: d0ra00732c1.pdf [file d0ra00732c1.pdf]

## Electronic supplementary information

Two 1D homochiral heterometallic chains: crystal structures, spectra,  
ferroelectricity and ferromagnetic properties

Zhuoqiang Zhou,<sup>a</sup> Ming-Xing Li,<sup>b</sup> Yan Sui,<sup>\*c</sup> Emmanuel N. Nfor<sup>d</sup> and Zhao-Xi  
Wang<sup>\*b</sup>

<sup>a</sup> Department of Pharmaceutical Engineering, College of Materials & Energy, South China of Agricultural University, Guangzhou 510642, PR China

<sup>b</sup> Department of Chemistry, Centre for Supramolecular Chemistry and Catalysis, Innovative Drug Research Centre, Shanghai University, Shanghai 200444, PR China.

<sup>c</sup> School of Chemistry and Chemical Engineering, The Key Laboratory of Coordination Chemistry of Jiangxi Province, Jingtangshan University, Ji'an, Jiangxi 343009, PR China

<sup>d</sup> Department of Chemistry, University of Buea, P.O. Box 63, Buea, SWR, Cameroon

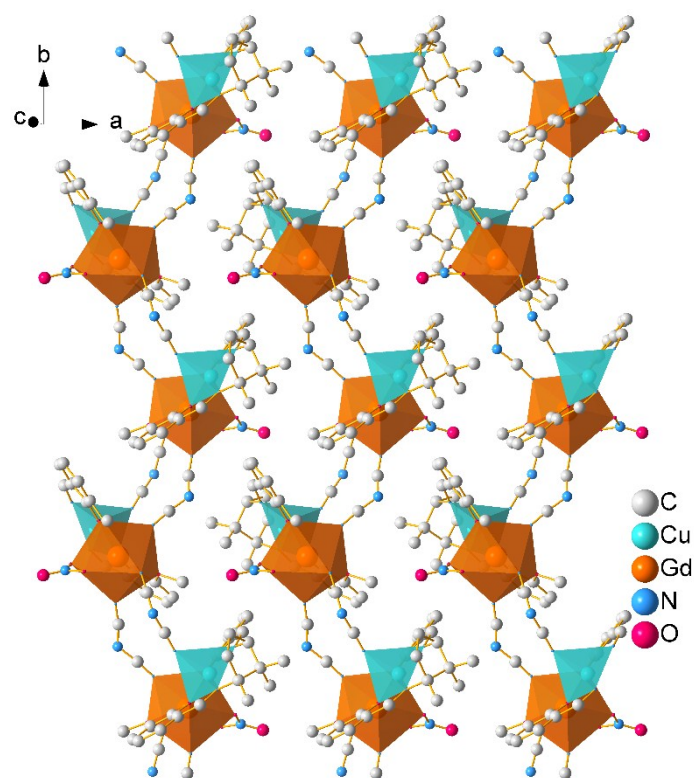

Fig.S1 2D layer of **1** in the *ab* plane.

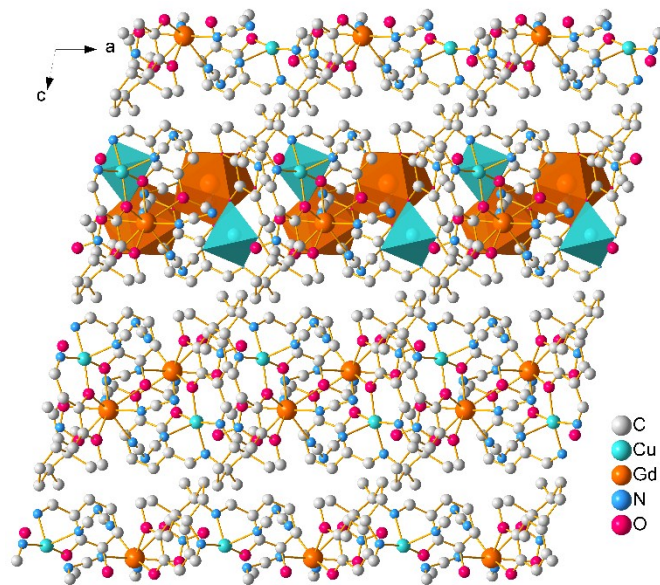

Fig.S2 3D supramolecular framework of **1**.

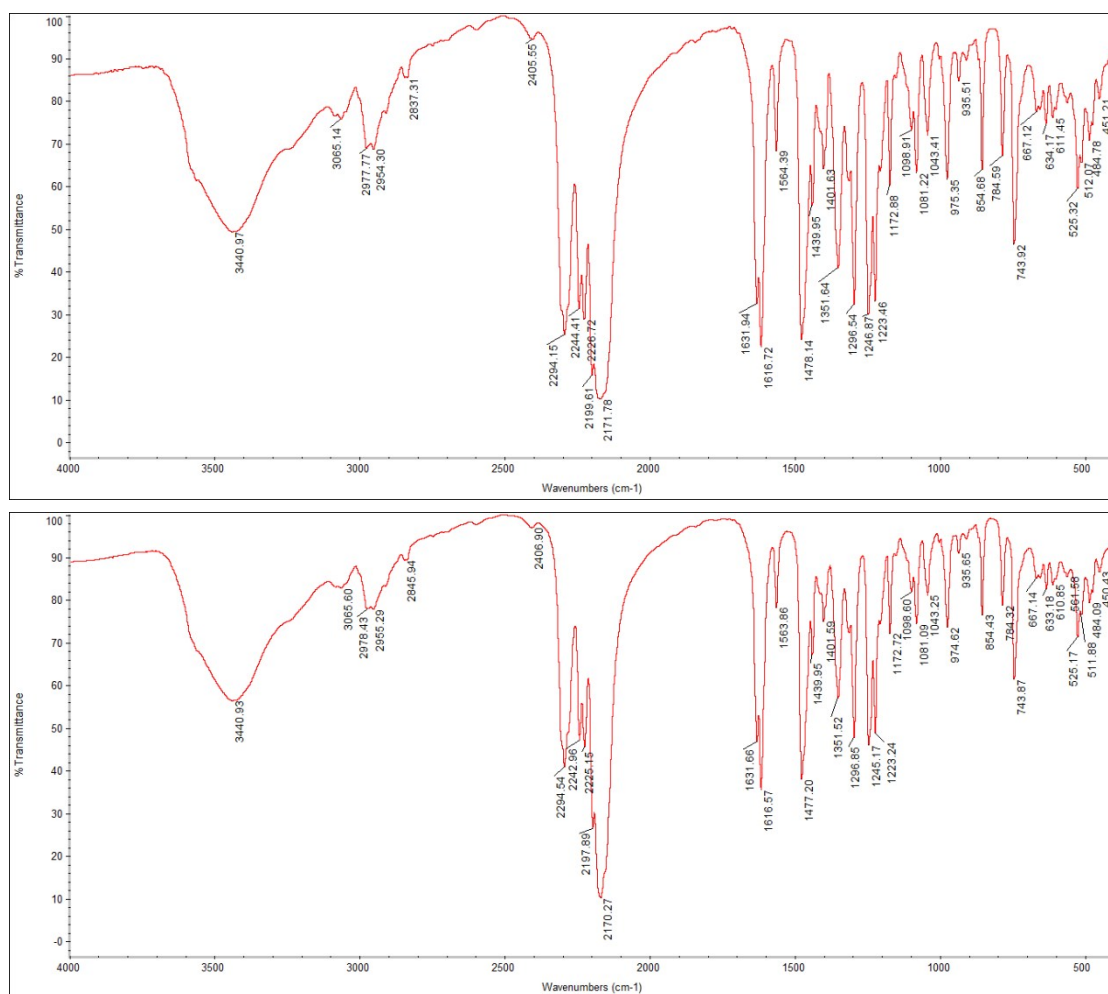

Fig.S3 Infrared spectra of **1** (up) and **2** (down).
